# Supplementary material for: Identification and Analysis of the Expression of the PIP5K Gene Family in Tomatoes
Source: MDPI journal article supplement (doi:10.3390/ijms25010159), 2023-12-21
Supplement: s1 [file s1]

## Supplementary Materials

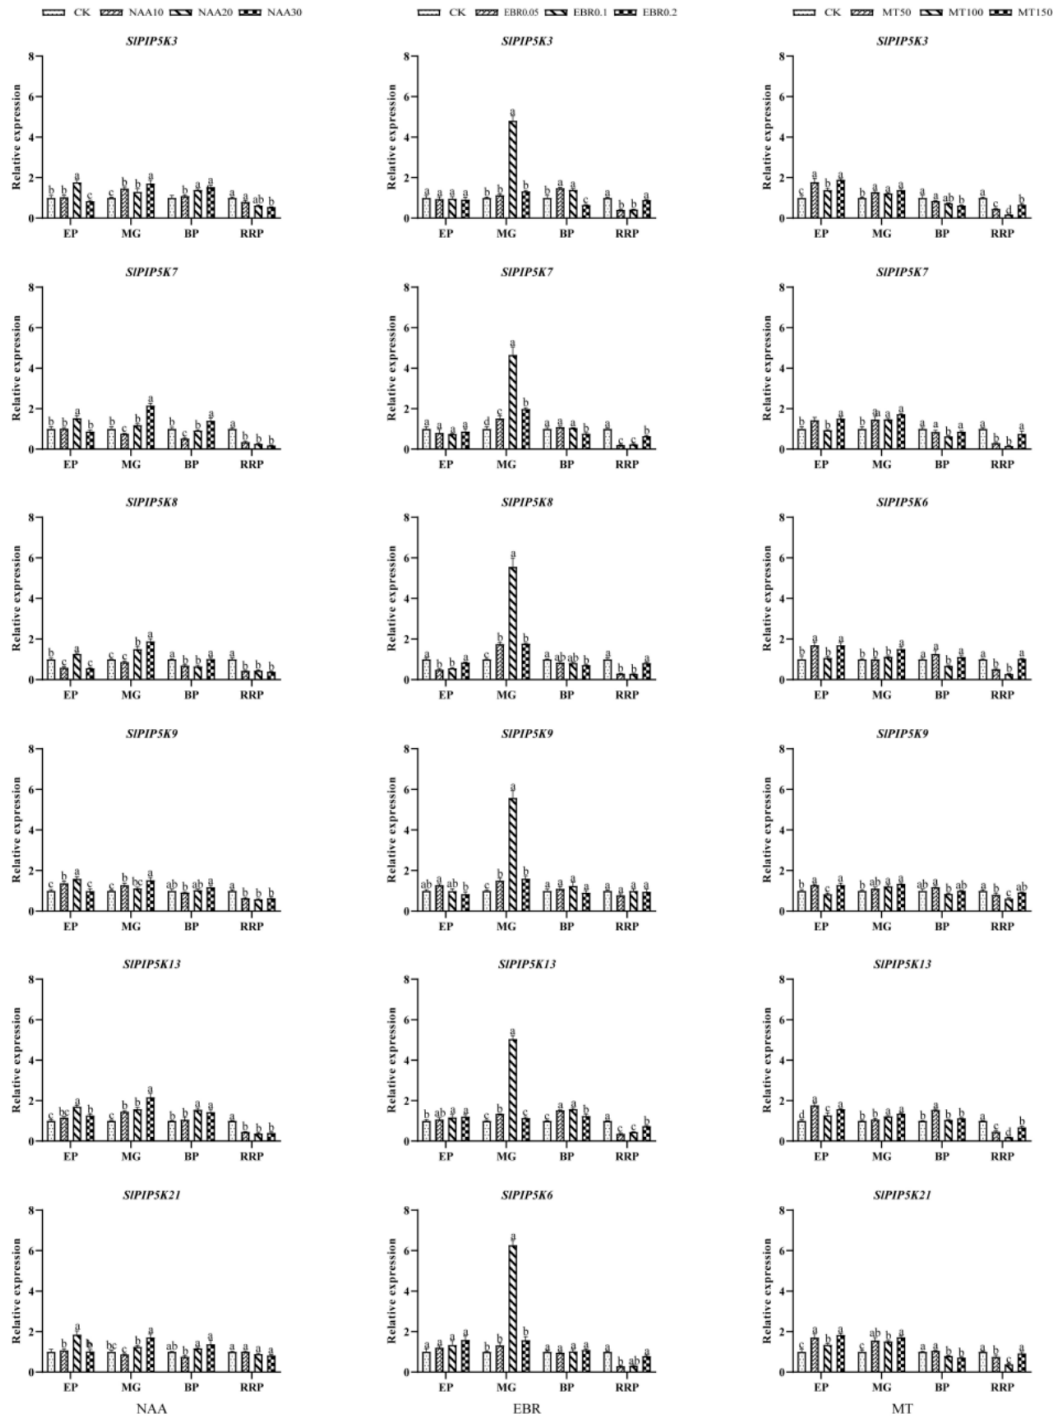

**Figure S1.** Expression of tomato *SIP5K* genes under different hormones. EP: swelling stage; MG: green ripening stage; BP: color conversion stage; RRP: red ripening stage. Different lower-case letters indicate significant differences between means as measured by ANOVA followed by Duncan's multiple range test ( $p < 0.05$ ).
